# Supplementary material
Source: HighWire-hosted journal article supplement (http://www.jrheum.org/highwire/filestream/34166/field_highwire_adjunct_files/0/171361DataSuppl.pdf)

**Supplementary Table 1.** Number of cases of malignancies (excluding NMSC) and NMSC and incidence rates by time in the baricitinib 2mg-4 mg-extended analysis set.

|                                     | 0-24 wks              |                       | 24-48 wks             |                       | 48-72 wks             |                       | 72-96 wks             |                       | 96 -120 wks           |                       | >120 wks              |                       | Overall               |                       |
|-------------------------------------|-----------------------|-----------------------|-----------------------|-----------------------|-----------------------|-----------------------|-----------------------|-----------------------|-----------------------|-----------------------|-----------------------|-----------------------|-----------------------|-----------------------|
|                                     | Bari<br>2 mg<br>N=479 | Bari<br>4 mg<br>N=479 | Bari<br>2 mg<br>N=479 | Bari<br>4 mg<br>N=479 | Bari<br>2 mg<br>N=479 | Bari<br>4 mg<br>N=479 | Bari<br>2 mg<br>N=479 | Bari<br>4 mg<br>N=479 | Bari<br>2 mg<br>N=479 | Bari<br>4 mg<br>N=479 | Bari<br>2 mg<br>N=479 | Bari<br>4 mg<br>N=479 | Bari<br>2 mg<br>N=479 | Bari<br>4 mg<br>N=479 |
| Malignancies<br>(excluding<br>NMSC) |                       |                       |                       |                       |                       |                       |                       |                       |                       |                       |                       |                       |                       |                       |
| Cases, n [IR]                       | 1 [0.5]               | 1 [0.5]               | 0                     | 0                     | 1 [1.3]               | 2 [2.3]               | 0                     | 1[1.9]                | 0                     | 1 [2.1]               | 1 [2.1]               | 3 [4.3]               | 3 [0.5]               | 8 [1.3]               |
| PY                                  | 200                   | 206                   | 121                   | 149                   | 77                    | 88                    | 64                    | 54                    | 56                    | 48                    | 47                    | 71                    | 564                   | 615                   |
| NMSC                                |                       |                       |                       |                       |                       |                       |                       |                       |                       |                       |                       |                       |                       |                       |
| Cases, n [IR]                       | 0                     | 3 [1.5]               | 2 [1.7]               | 2 [1.4]               | 0                     | 0                     | 0                     | 0                     | 0                     | 1 [2.1]               | 0                     | 0                     | 2 [0.4]               | 6 [1.0]               |
| PY                                  | 200                   | 206                   | 121                   | 147                   | 76                    | 87                    | 63                    | 53                    | 56                    | 47                    | 47                    | 67                    | 563                   | 607                   |

Bari, baricitinib; IR, incident rate/100 patient-years (patient exposure censored at event); NMSC, non-melanoma skin cancer; n, number of cases; PY, patient-years of exposure.

**Supplementary Table 2.** Case summary of malignancies (excluding NMSC) for all the cases in the baricitinib 2mg-4mg-extended analysis set as randomized. LTE: longterm extension.

| Patient #                      | Event term                            | Days from first dose to event start date | Days from rescue/dose change to event start date | Details of rescue/dose change prior to event |
|--------------------------------|---------------------------------------|------------------------------------------|--------------------------------------------------|----------------------------------------------|
| Randomized to baricitinib 2 mg |                                       |                                          |                                                  |                                              |
| 1                              | Ovarian low malignant potential tumor | 19                                       | NA                                               | NA                                           |
| 2                              | Invasive ductal breast carcinoma      | 339                                      | NA                                               | NA                                           |
| 3                              | Lung neoplasm malignant               | 479                                      | 228                                              | Rescue to 4 mg in LTE                        |
| 4                              | Clear cell renal cell carcinoma       | 575                                      | 325                                              | Rescue to 4 mg in LTE                        |
| 5                              | Mucoepidermoid carcinoma              | 785                                      | 532                                              | Rescue to 4 mg in LTE                        |
| 6                              | Breast cancer                         | 898                                      | NA                                               | NA                                           |
| 7                              | Papillary thyroid cancer              | 963                                      | 794                                              | Switch to 4 mg                               |
| Randomized to baricitinib 4 mg |                                       |                                          |                                                  |                                              |
| 1                              | Rectal cancer                         | 115                                      | NA                                               | NA                                           |
| 2                              | Renal cancer                          | 361                                      | NA                                               | NA                                           |
| 3                              | Adenocarcinoma of colon               | 357                                      | NA                                               | NA                                           |
| 4                              | Invasive ductal breast carcinoma      | 401                                      | 289                                              | Rescue in originating study                  |
| 5                              | Diffuse large B-cell lymphoma         | 670                                      | NA                                               | NA                                           |
| 6                              | Breast cancer                         | 690                                      | NA                                               | NA                                           |
| 7                              | Squamous cell carcinoma of the lung   | 981                                      | NA                                               | NA                                           |
| 8                              | Breast cancer                         | 1004                                     | NA                                               | NA                                           |
| 9                              | Invasive ductal breast carcinoma      | 1296                                     | NA                                               | NA                                           |

**Supplementary Figure 1.** DVT/PE-related events over time for all-bari-RA analysis set (IR/100PY [95% confidence interval, CI]).

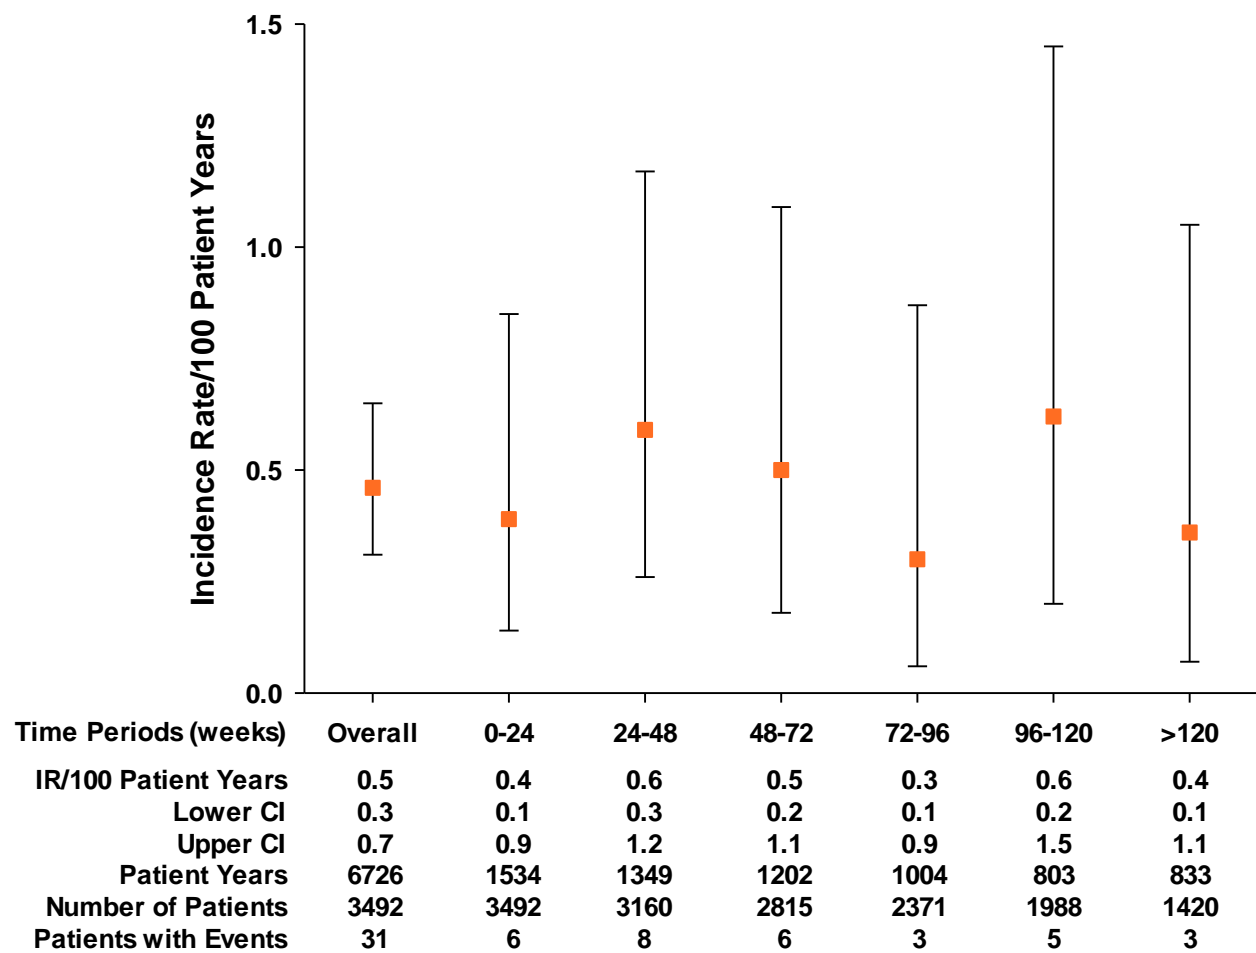

**Supplementary Figure 2.** Selected laboratory and chemistry profiles absolute values over time from the DMARD-inadequate responder 4 mg long-term cohort (extracted from all-bari-RA analysis set for patients initially randomized to and maintained on 4 mg arm in RA-BEAM, RA-BEACON, RA-BUILD, Phase 2 trial NCT01185353, and the LTE). (A) Hemoglobin absolute values over time. (B) Lymphocytes absolute values over time. (C) Neutrophils absolute values over time. (D) Platelet absolute values over time. (E) Creatinine absolute values over time. (F) Alanine aminotransferase (ALT) absolute values over time.

A. Hemoglobin absolute values over time

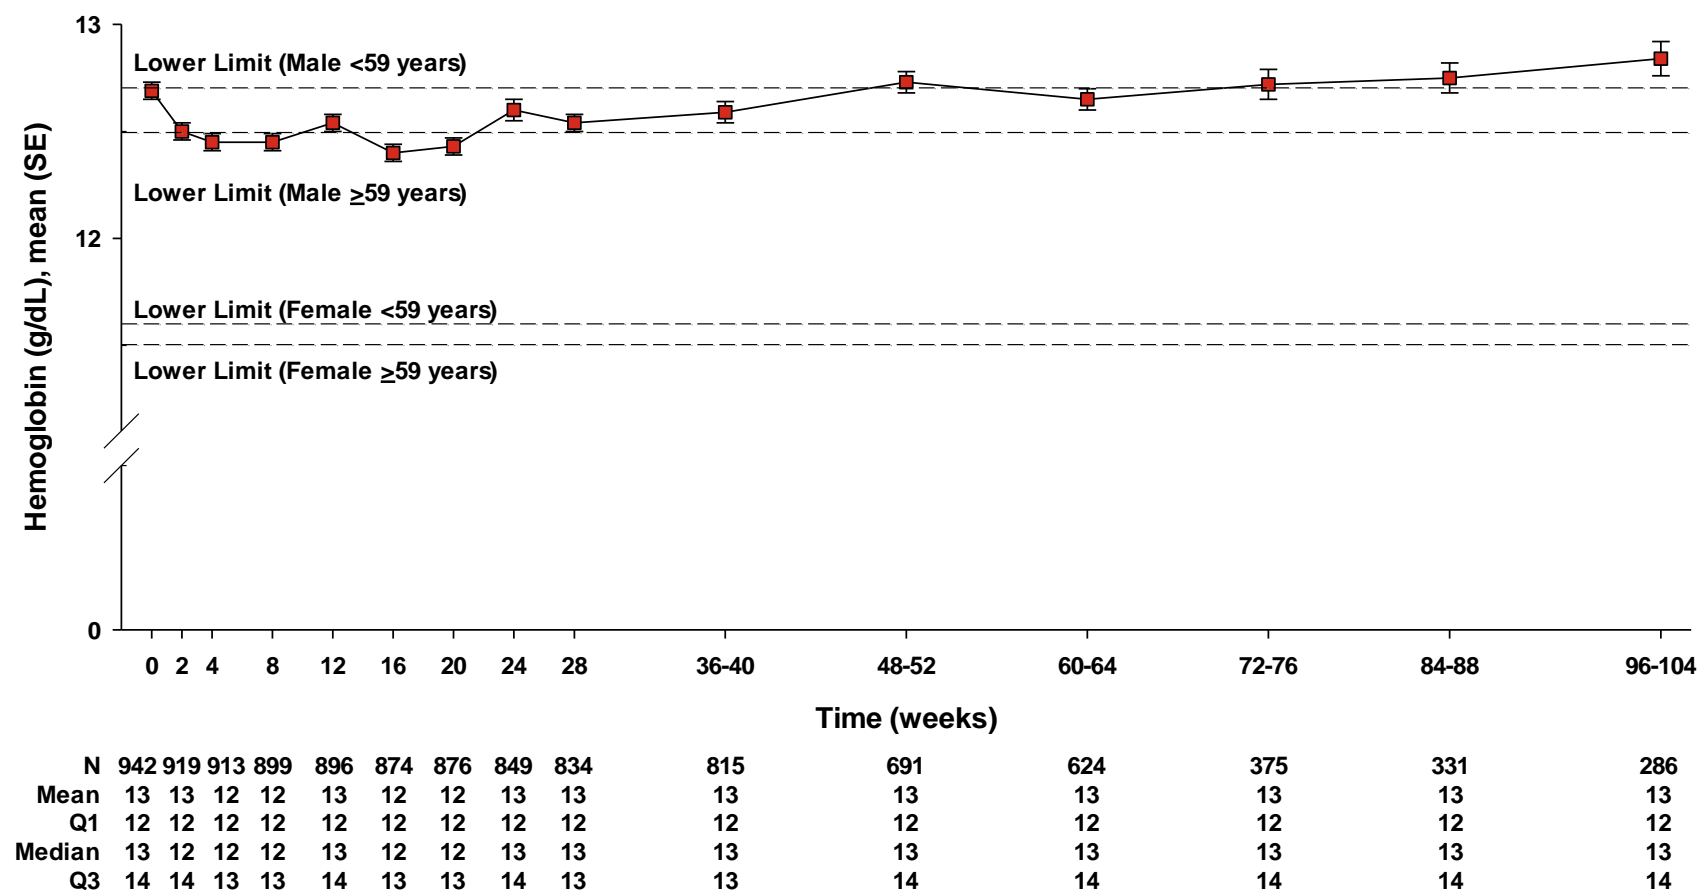

B. Lymphocytes absolute values over time

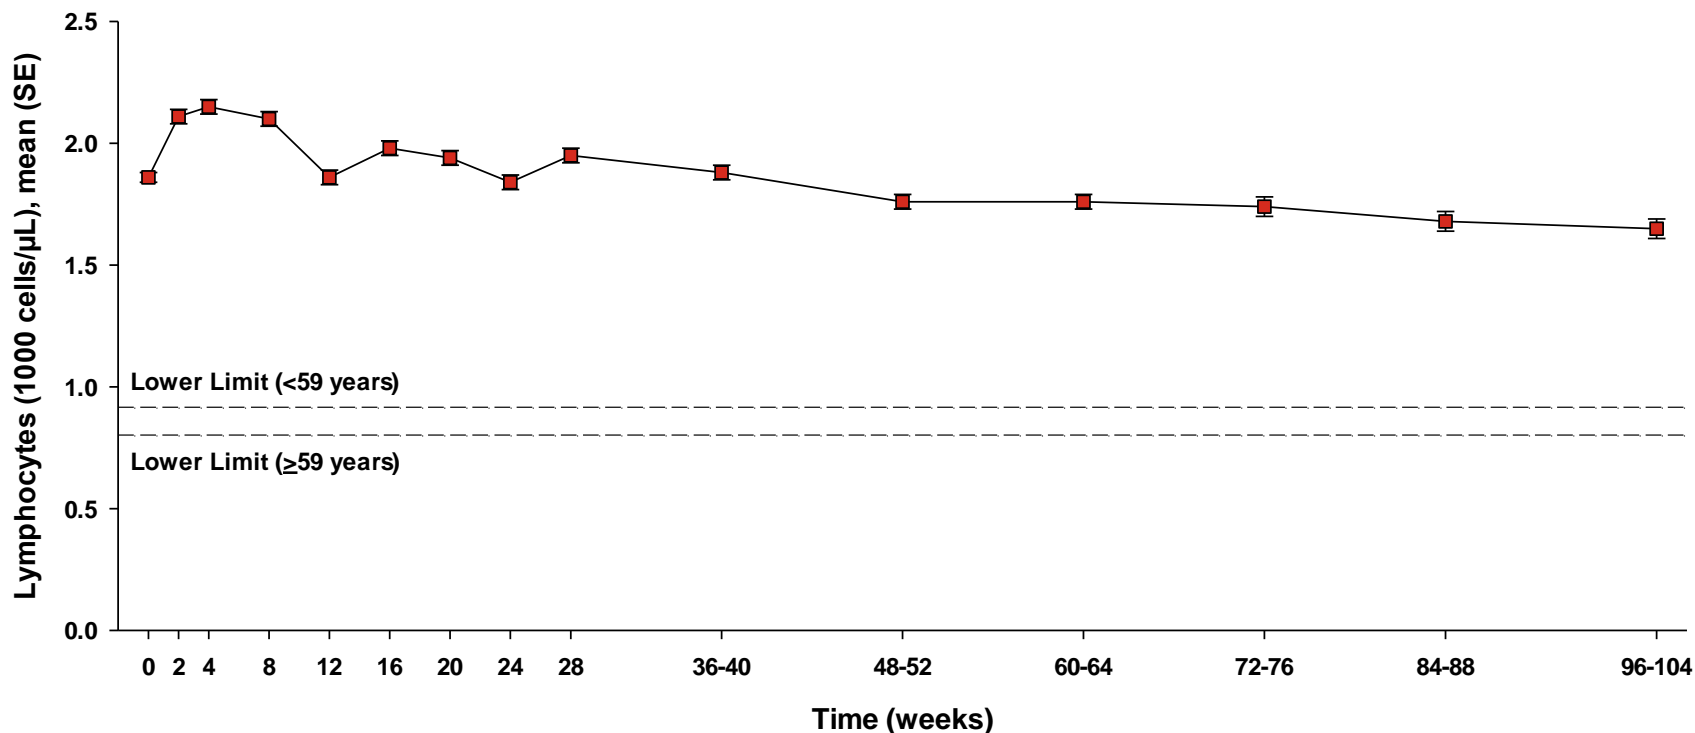

|               | 0   | 2   | 4   | 8   | 12  | 16  | 20  | 24  | 28  | 36-40 | 48-52 | 60-64 | 72-76 | 84-88 | 96-104 |
|---------------|-----|-----|-----|-----|-----|-----|-----|-----|-----|-------|-------|-------|-------|-------|--------|
| <b>N</b>      | 942 | 906 | 903 | 889 | 889 | 869 | 868 | 840 | 832 | 809   | 686   | 619   | 374   | 328   | 286    |
| <b>Mean</b>   | 1.9 | 2.1 | 2.2 | 2.1 | 1.9 | 2.0 | 1.9 | 1.8 | 2.0 | 1.9   | 1.8   | 1.8   | 1.7   | 1.7   | 1.7    |
| <b>Q1</b>     | 1.4 | 1.5 | 1.5 | 1.5 | 1.3 | 1.4 | 1.4 | 1.3 | 1.4 | 1.4   | 1.3   | 1.3   | 1.3   | 1.2   | 1.2    |
| <b>Median</b> | 1.8 | 2.0 | 2.0 | 2.0 | 1.7 | 1.9 | 1.8 | 1.7 | 1.9 | 1.8   | 1.7   | 1.6   | 1.6   | 1.6   | 1.5    |
| <b>Q3</b>     | 2.2 | 2.6 | 2.6 | 2.6 | 2.2 | 2.4 | 2.3 | 2.2 | 2.4 | 2.3   | 2.1   | 2.1   | 2.1   | 2.1   | 2.0    |

C. Neutrophils absolute values over time

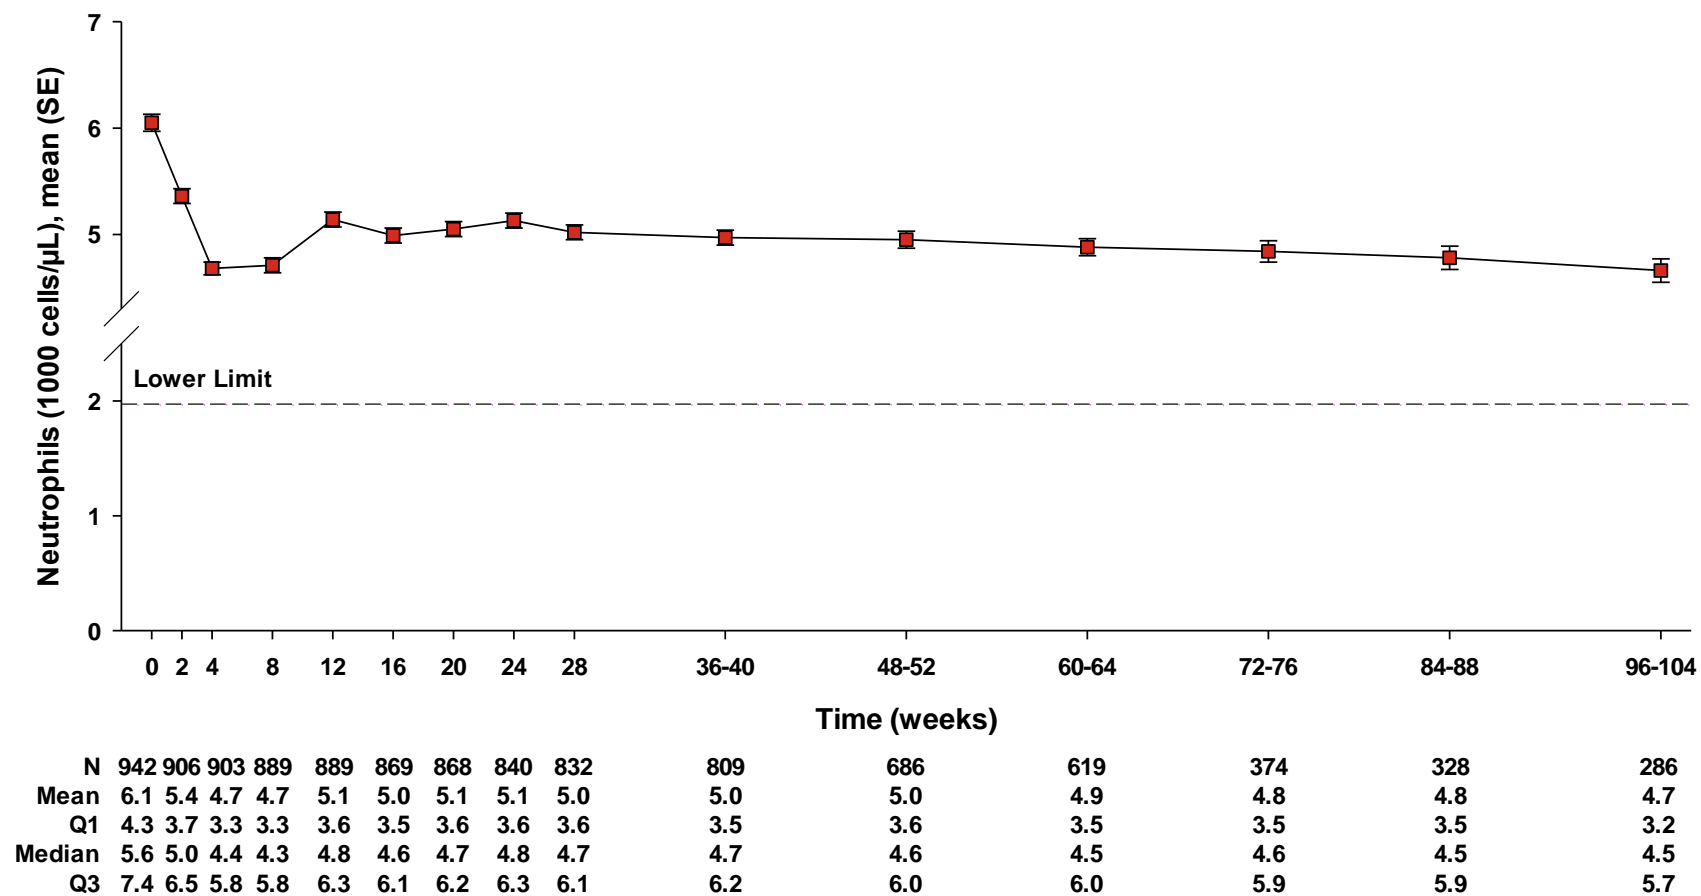

D. Platelet absolute values over time

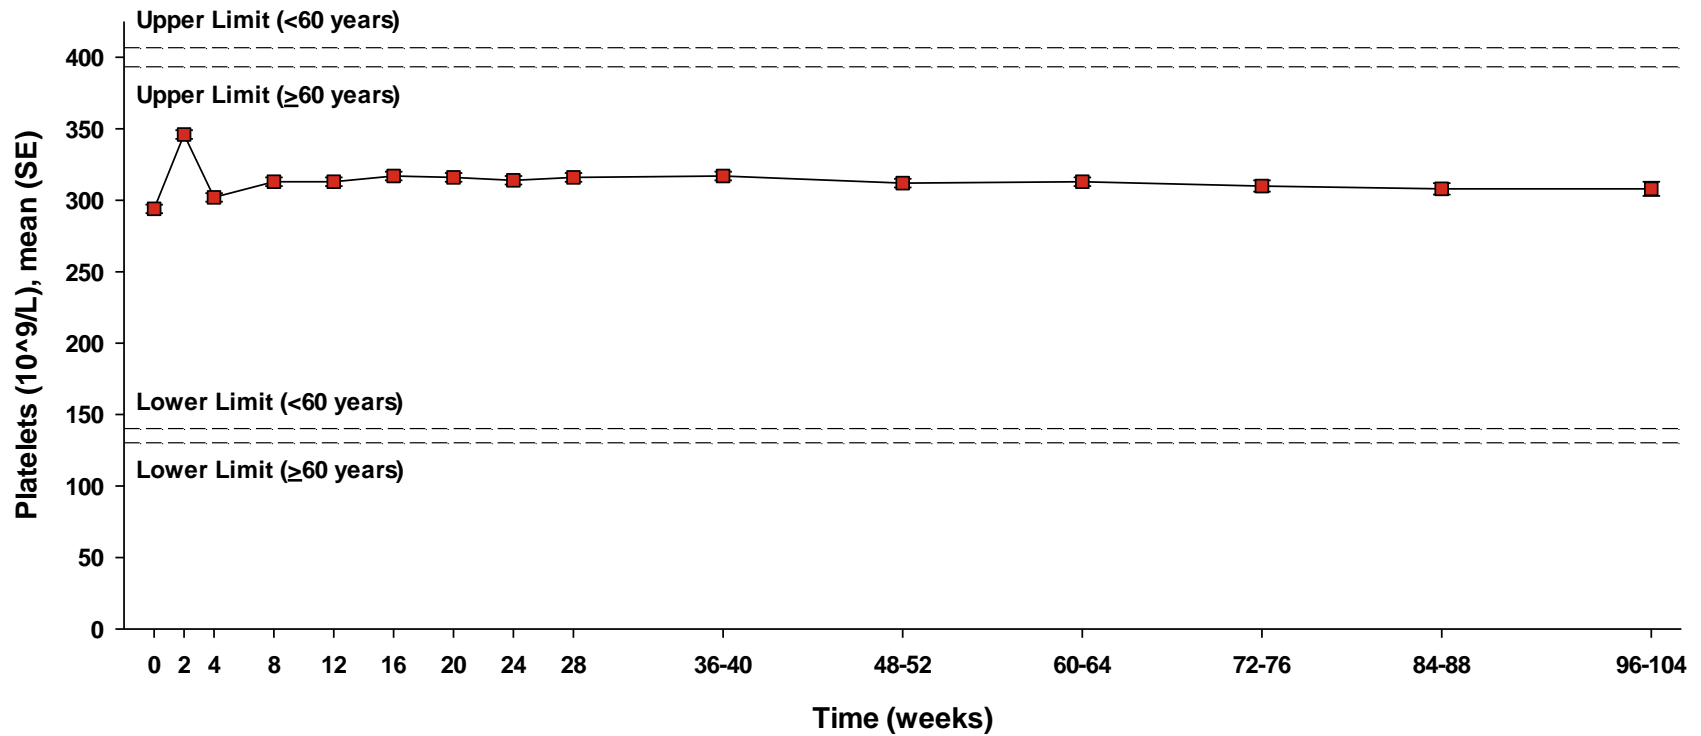

|        | 0   | 2   | 4   | 8   | 12  | 16  | 20  | 24  | 28  | 36-40 | 48-52 | 60-64 | 72-76 | 84-88 | 96-104 |
|--------|-----|-----|-----|-----|-----|-----|-----|-----|-----|-------|-------|-------|-------|-------|--------|
| N      | 940 | 909 | 896 | 886 | 885 | 869 | 868 | 834 | 821 | 808   | 679   | 617   | 369   | 326   | 283    |
| Mean   | 294 | 346 | 302 | 313 | 313 | 317 | 316 | 314 | 316 | 317   | 312   | 313   | 310   | 308   | 308    |
| Q1     | 239 | 280 | 246 | 257 | 260 | 263 | 260 | 255 | 257 | 260   | 259   | 261   | 252   | 251   | 251    |
| Median | 282 | 329 | 293 | 304 | 306 | 309 | 307 | 305 | 306 | 310   | 299   | 303   | 301   | 301   | 301    |
| Q3     | 342 | 404 | 350 | 361 | 358 | 366 | 366 | 363 | 362 | 365   | 359   | 361   | 354   | 359   | 354    |

E. Creatinine values over time

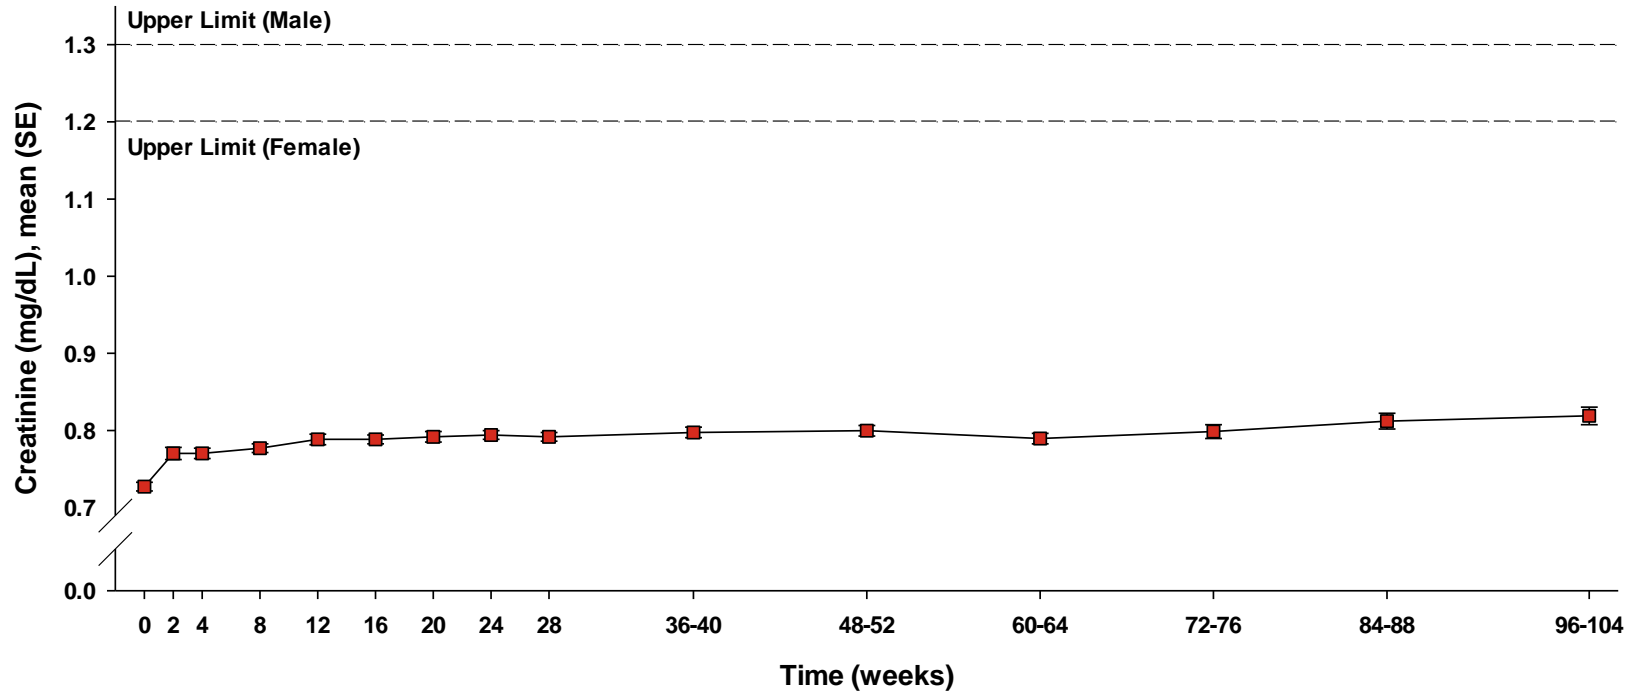

|                           | 0   | 2   | 4   | 8   | 12  | 16  | 20  | 24  | 28  | 36-40 | 48-52 | 60-64 | 72-76 | 84-88 | 96-104 |
|---------------------------|-----|-----|-----|-----|-----|-----|-----|-----|-----|-------|-------|-------|-------|-------|--------|
| N                         | 942 | 927 | 914 | 909 | 890 | 878 | 879 | 858 | 838 | 815   | 699   | 625   | 381   | 332   | 292    |
| Mean                      | .73 | .77 | .77 | .78 | .79 | .79 | .79 | .79 | .79 | .80   | .80   | .79   | .80   | .81   | .82    |
| Q1                        | .61 | .64 | .64 | .66 | .66 | .67 | .67 | .67 | .67 | .68   | .66   | .67   | .67   | .67   | .67    |
| Median                    | .71 | .74 | .74 | .76 | .77 | .77 | .77 | .77 | .77 | .77   | .77   | .78   | .77   | .77   | .80    |
| Q3                        | .83 | .87 | .86 | .87 | .89 | .89 | .89 | .89 | .89 | .90   | .92   | .88   | .89   | .92   | .93    |
| Mean Change from Baseline | .00 | .04 | .04 | .05 | .06 | .06 | .07 | .07 | .07 | .07   | .08   | .08   | .08   | .09   | .09    |



F. Alanine aminotransferase (ALT) absolute values over time

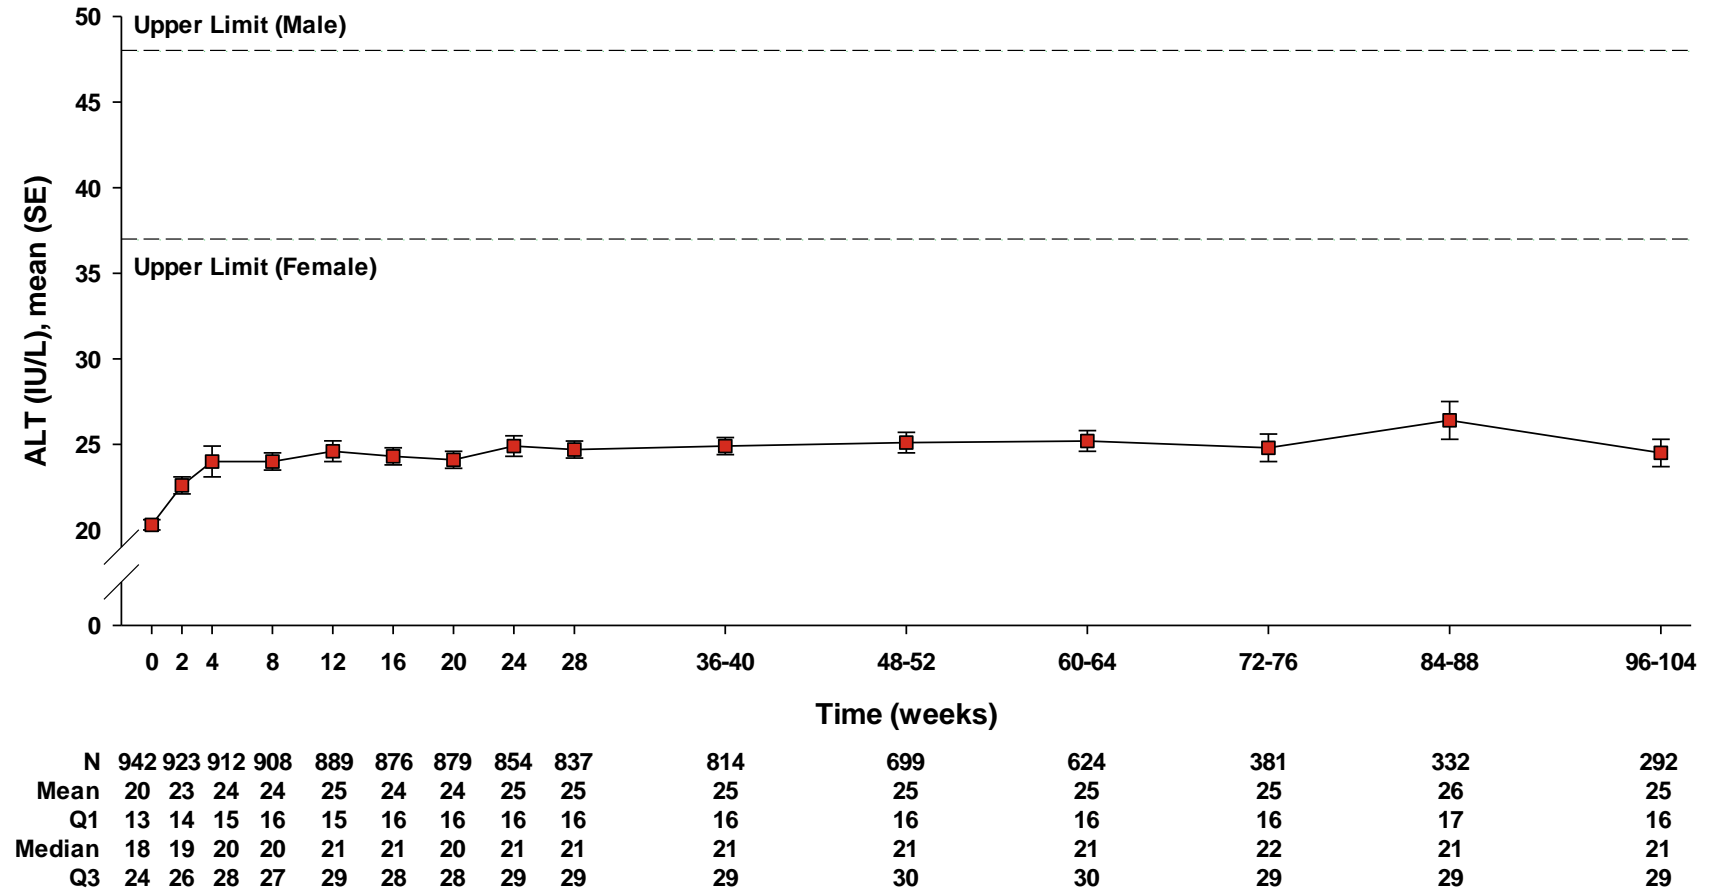

Supplement: 171361DataSuppl.pdf [file 171361DataSuppl.pdf]
